# Supplementary figures and images for: Candidate regulators and target genes of drought stress in needles and roots of Norway spruce
Source: PubMed Central journal article supplement — Tree Physiol. 2021 Jan 8;41(7):1230–46. doi: 10.1093/treephys/tpaa178 (PMC8271197; doi:10.1093/treephys/tpaa178), 2021-01-08

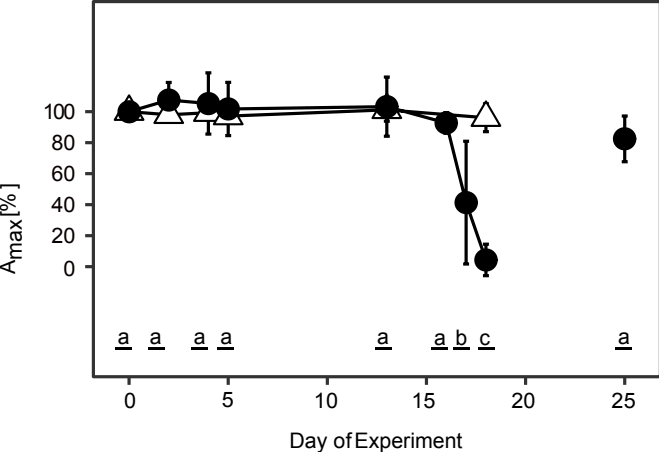

Supplement: figs1_tpaa178.pdf [file figs1_tpaa178.pdf]

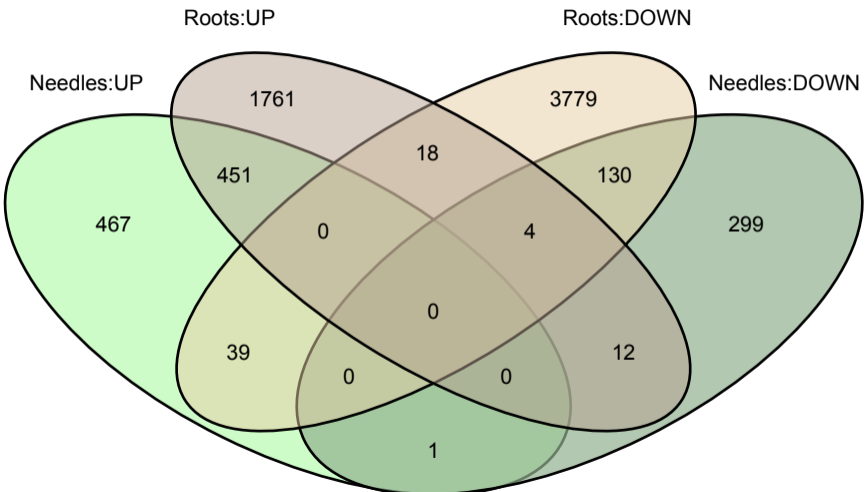

Supplement: figs3_tpaa178.pdf [file figs3_tpaa178.pdf]

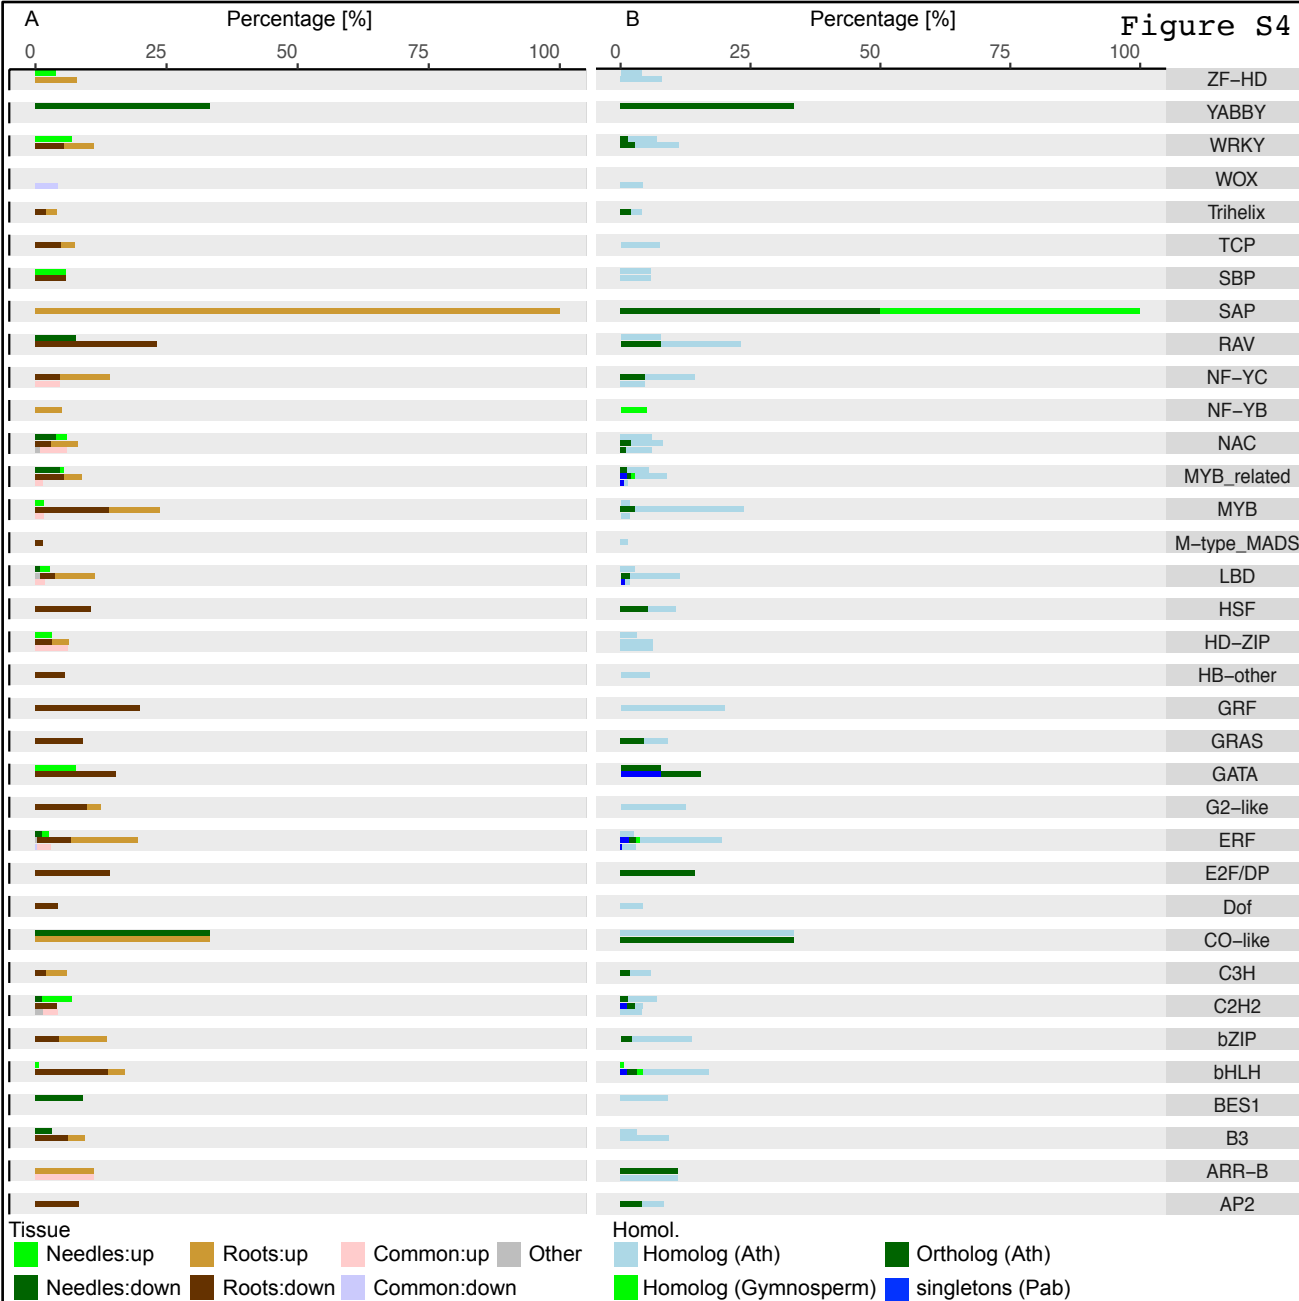

Supplement: figs6_tpaa178.pdf [file figs6_tpaa178.pdf]
